# Supplementary material for: TIAM1-mediated synaptic plasticity underlies comorbid depression–like and ketamine antidepressant–like actions in chronic pain
Source: JCI journal article supplement (doi:10.1172/jci158545), 2022-12-14
Supplement: sd1 [file 1]

301 Moved Permanently

# Moved Permanently

The document has moved here.
